# Supplementary material for: N-cadherin stabilises neural identity by dampening anti-neural signals
Source: PubMed Central journal article supplement (PMC6857587; doi:10.1242/dev.183269), 2019-11-01
Supplement: develop-146-183269-s1.pdf [file develop-146-183269-s1.pdf]

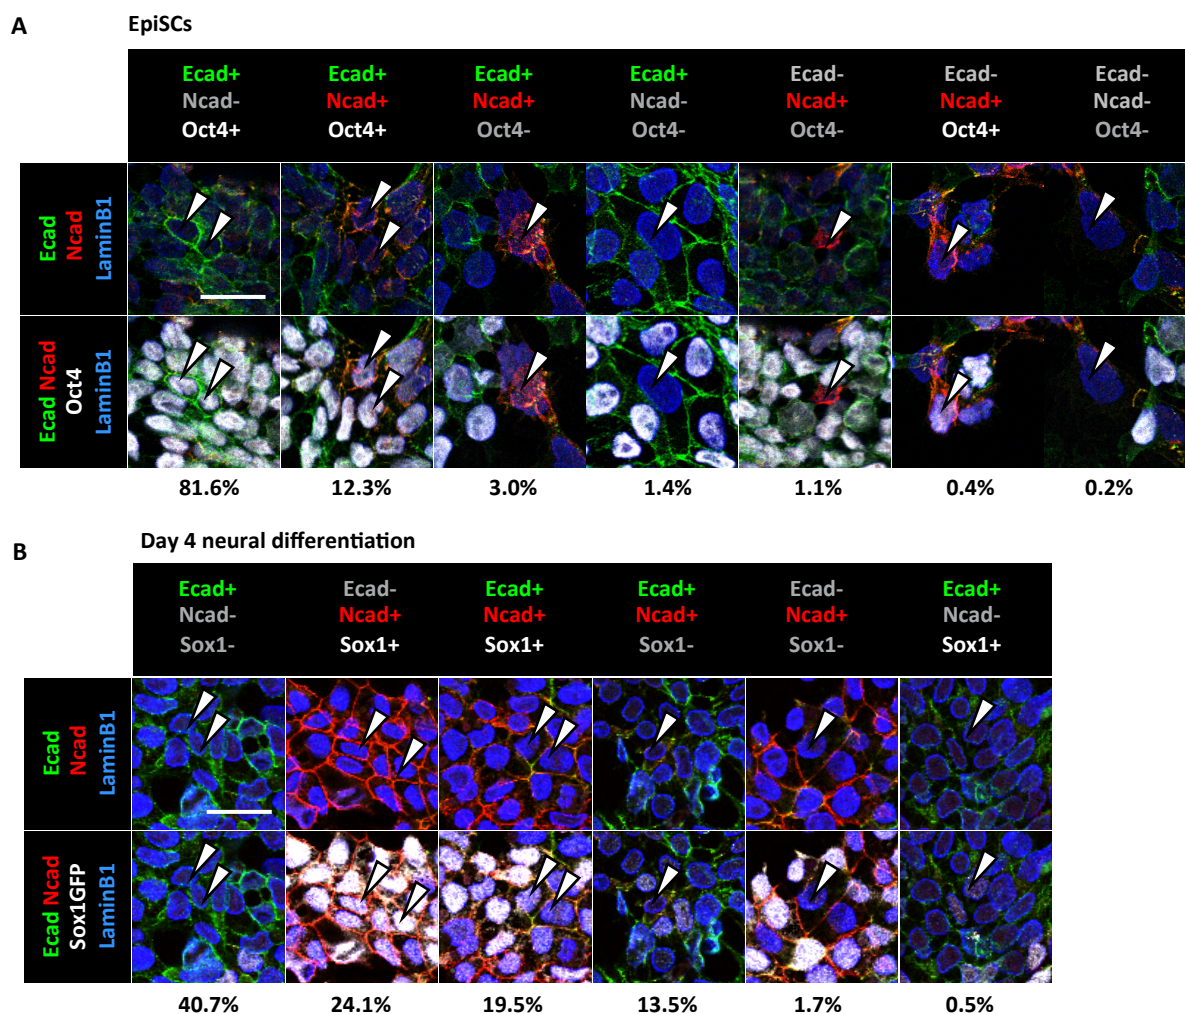

**Figure S1: Single-cell views of protein co-expression in EpiSCs and during neural differentiation.** White arrowheads point out individual cells of the given protein expression profile. Percentages below images indicate the proportion of cells of a given identity out of all cells analysed (manual quantification). Scale bars=25µm. **A.** EpiSCs stained for E-cadherin (green), N-cadherin (red), the pluripotency marker Oct4 (white) and nuclear envelope marker LaminB1 (blue). N=2596 cells from three biological replicates **B.** Cells on day four of neural differentiation from a 2i-Lif starting population stained for E-cadherin (green), N-cadherin (red), Sox1-GFP (shown in white), and nuclear envelope marker LaminB1 (blue). N=2275 cells from three biological replicates.

**A: Ecadh<sup>Ncadh/Ncadh</sup> cells**

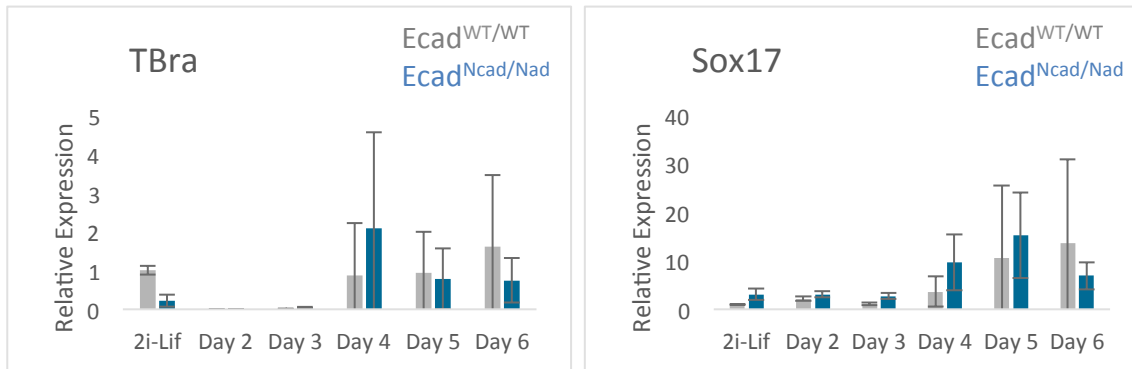

**B: Dox-inducible N-Cadherin**

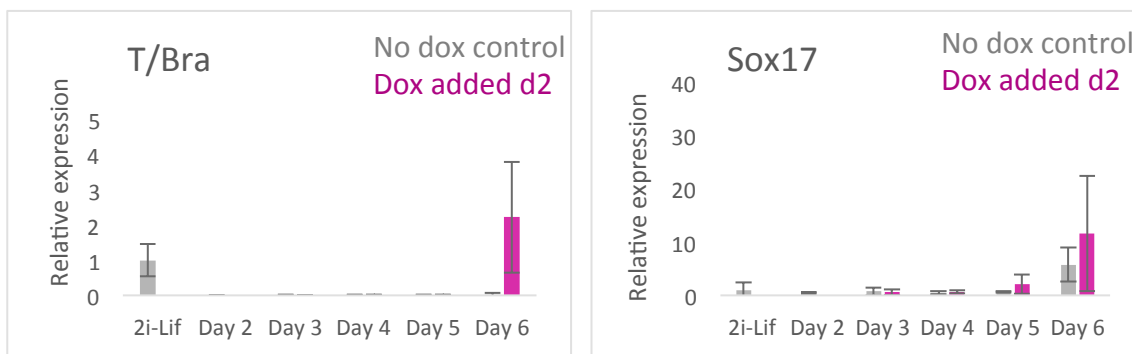

**Figure S2: Cadherin switching has no clear effect on mesoderm or endoderm markers in the context of neural differentiation**

A: qPCR analysis of *Ecadh*<sup>Ncadh/Ncadh</sup> cells during successive days of neural differentiation. N=3. Values normalised to control cell line on D0.

B: qPCR analysis of inducible N-cadherin overexpressing cells during neural differentiation; Dox added on day 2. N=9 (three biological replicates of three independent clones). Values normalised to control cell line on D0

Error bars=SD.

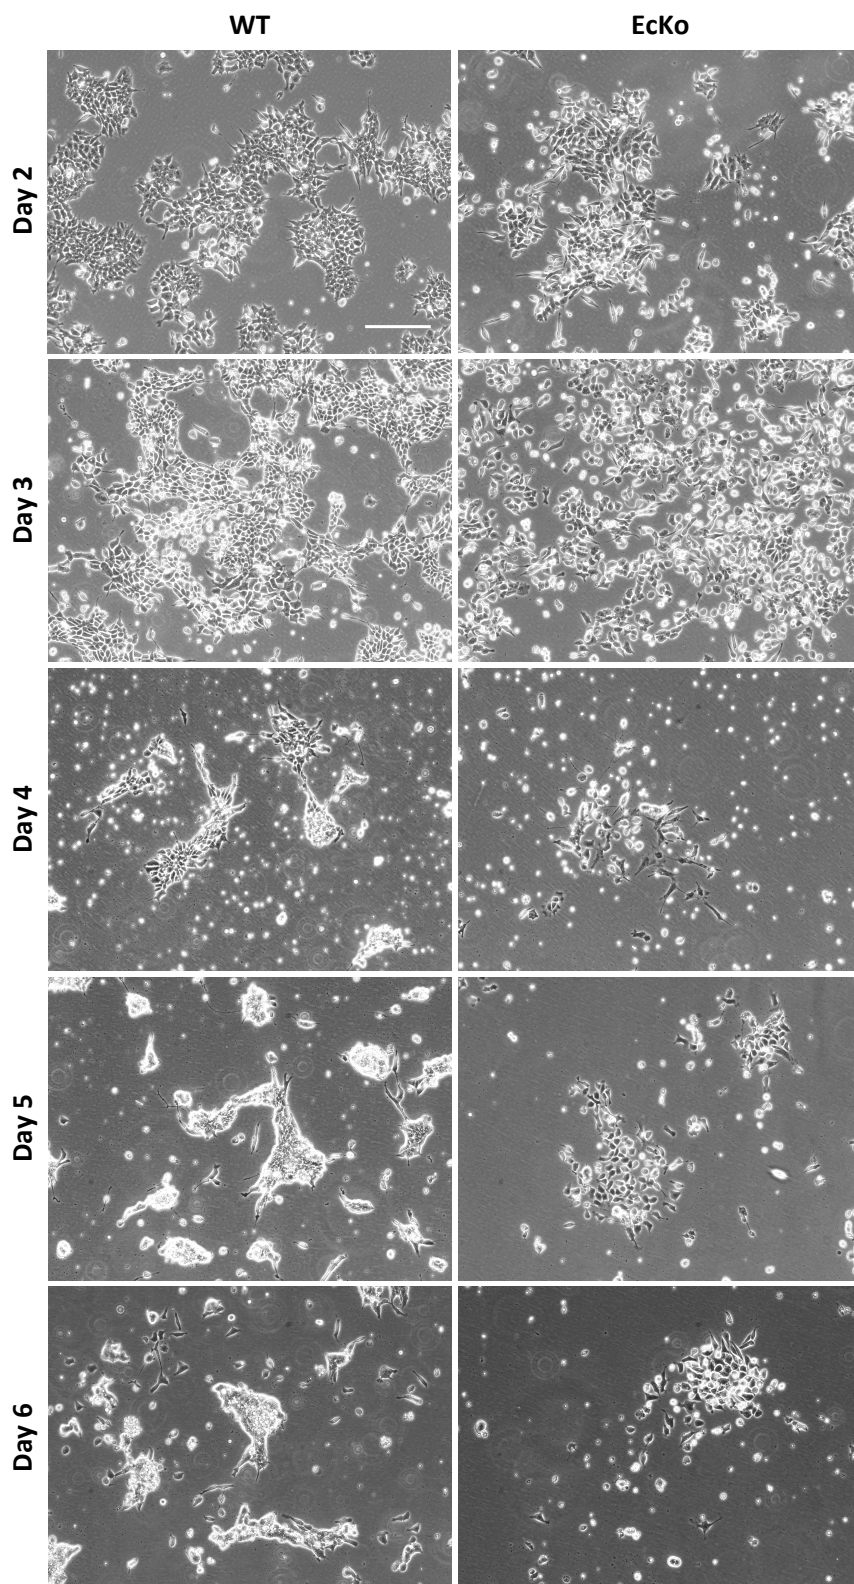

**Figure S3:  $Ecad^{-/-}$  cells die after prolonged culture in N2B27.** Phase contrast images of  $Ecad^{Flx/Flx}$  and  $Ecad^{-/-}$  cells on days 2-6 of neural differentiation from a 2i-Lif starting population. Scalebar= 100 $\mu$ m.

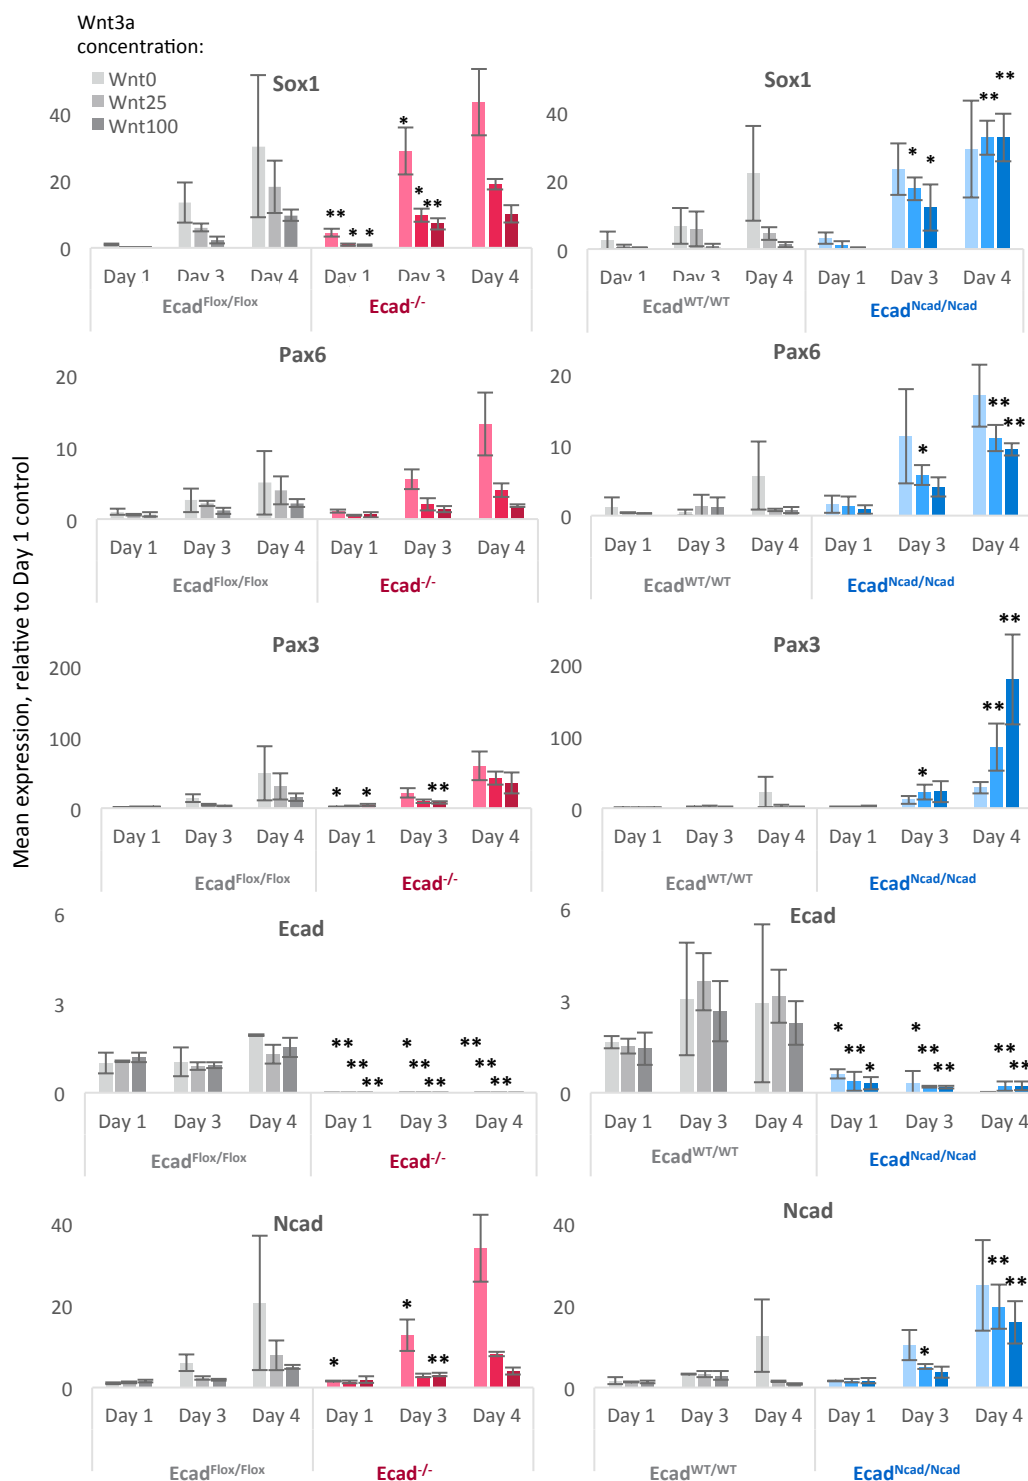

**Figure S4: Effects of cadherin switching on  $\beta$ -catenin and WNT signalling.** qPCR analysis of Ecad<sup>Flox/Flox</sup> and Ecad<sup>Ncad/Ncad</sup> cells during neural differentiation in increasing concentrations of Wnt3a; bars denote mean expression relative to the Day 1 condition of the relevant control cell line (grey). Asterisks denote significant difference compared to the paired control cell line in the same condition. N=3 biological replicates. Error bars=SD, \*p<0.05, \*\*p<0.01, paired T-test.



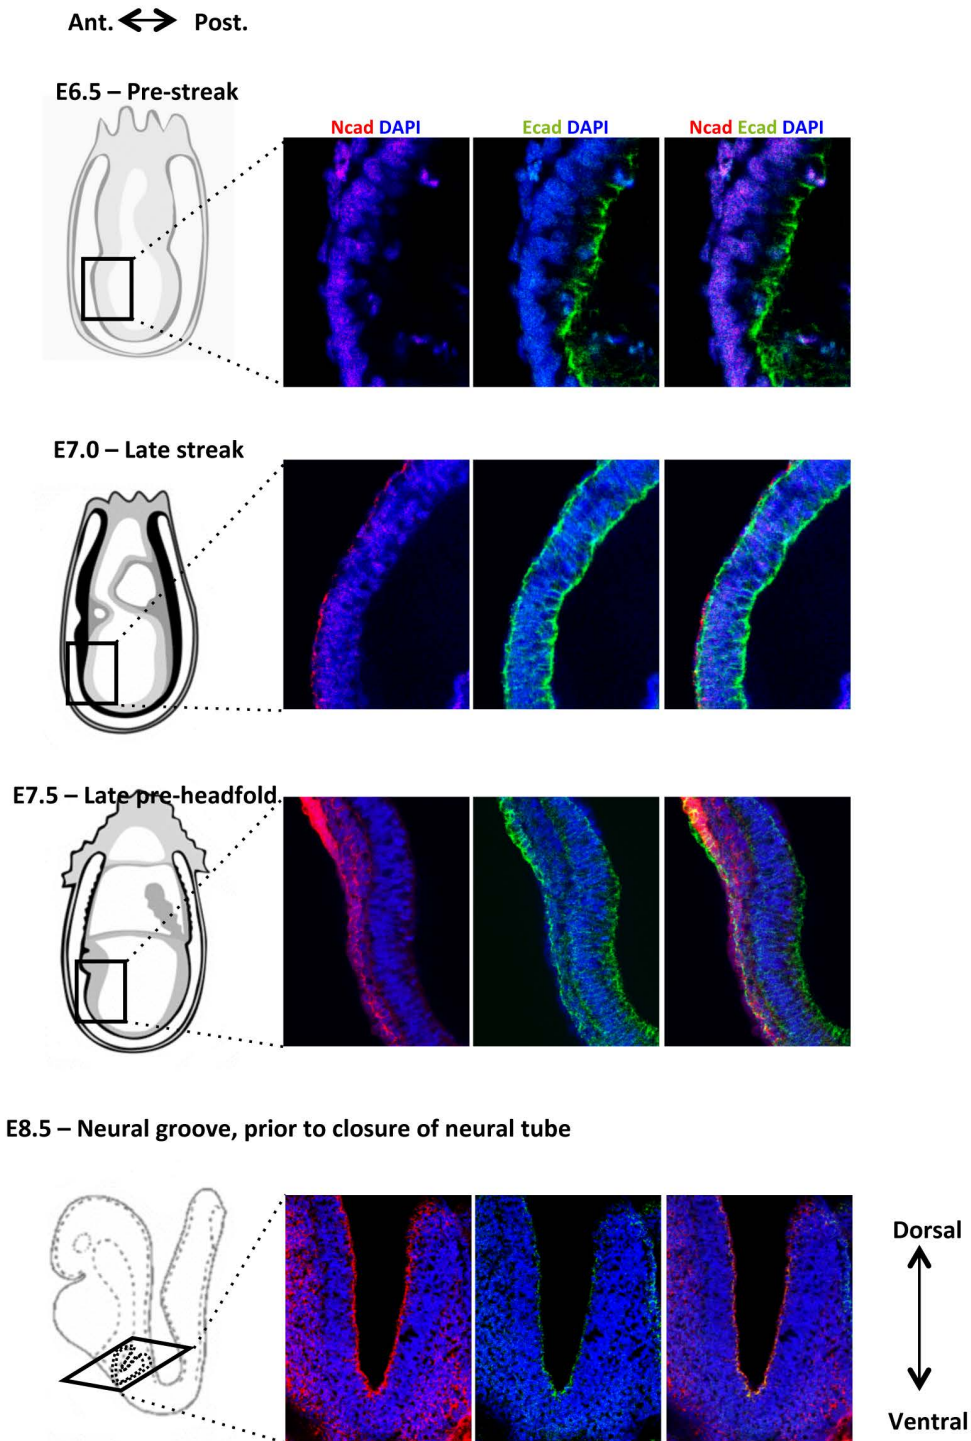

**Figure S5: Cadherin switching in vivo.** E-Cadherin (green) and N-Cadherin (red) immunostaining at various stages of mouse development as indicated. Embryo drawings are adapted from the EMAP eMouse Atlas Project (<http://www.emouseatlas.org>).

**Table S1: qPCR primer sequences.**

Primers used with the Universal Probe Library qPCR system from Roche.

| <b>Target gene</b> | <b>Forward sequence</b> | <b>Reverse sequence</b> | <b>UPL probe number</b> |
|--------------------|-------------------------|-------------------------|-------------------------|
| <i>Ap2a</i>        | CCGGGTATTAACATCCCAGAT   | CCGAAGAGGTTGTCCTTGTTA   | 94                      |
| <i>Axin2</i>       | TGGGGAGCAGTTTTGTGC      | CGGCTGACTCGTTCTCCT      | 96                      |
| <i>Cdh1</i>        | ATCCTCGCCCTGCTGATT      | ACCACCGTTCTCCTCCGTA     | 18                      |
| <i>Cdh2</i>        | GCCATCATCGCTATCCTTCT    | CCGTTTCATCCATACCACAAA   | 18                      |
| <i>Dusp4</i>       | GCCTGGCCTACCTGATGAT     | GCTGCTTGACGAACTCAAAA    | 25                      |
| <i>Etv4</i>        | GGGTACCTTGGTGAGCACAG    | CCCTGAGGAGATGTGAAGGA    | 66                      |
| <i>Nanog</i>       | CCTCCAGCAGATGCAAGAA     | GCTTGCACTTCATCCTTTGG    | 25                      |
| <i>Pax3</i>        | AAAAGGCTAAACACAGCATCG   | CAATATCGGAGCCTTCATCTG   | 110                     |
| <i>Pax6</i>        | GTTCCCTGTCCTGTGGACTC    | ACCGCCCTTGGTTAAAGTCT    | 78                      |
| <i>Pou3f1</i>      | CTCAAGCCGCTGCTCAAC      | CGCGATCTTGCCAGGTT       | 25                      |
| <i>Pou5f1</i>      | GTTGGAGAAGGTGGAACCAA    | CTCCTTCTGCAGGGCTTTC     | 95                      |
| <i>SDHA</i>        | CAGTTCCACCCCACAGGTA     | TCTCCACGACACCCTTCTGT    | 71                      |
| <i>Sox1</i>        | GTGACATCTGCCCCATC       | GAGGCCAGTCTGGTGTCAG     | 60                      |
| <i>Sox17</i>       | CACAACGCAGAGCTAAGCAA    | CGCTTCTCTGCCAAGGTC      | 97                      |
| <i>T</i>           | ACTGGTCTAGCCTCGGAGTG    | TTGCTCACAGACCAGAGACTG   | 27                      |
| <i>TBP</i>         | GGGGAGCTGTGATGTGAAGT    | CCAGGAAATAATTCTGGCTCA   | 97                      |
| <i>Ywhaz</i>       | TTACTTGGCCGAGGTTGCT     | TGCTGTGACTGGTCCACAAT    | 9                       |

**Table S2: RPPA antibodies**

All antibodies were raised in rabbit

| Epitope                                            | Supplier                    | Catalogue no. |
|----------------------------------------------------|-----------------------------|---------------|
| Akt                                                | Cell Signaling Technologies | 9272          |
| Akt P Ser473                                       | Cell Signaling Technologies | 4060          |
| Akt P Thr308                                       | Cell Signaling Technologies | 2965          |
| beta-actin                                         | Cell Signaling Technologies | 4970          |
| beta-Catenin                                       | Cell Signaling Technologies | 9562          |
| beta-Catenin P Ser33,Ser37,Thr41                   | Cell Signaling Technologies | 9561          |
| beta-Catenin P Thr41,Ser45                         | Cell Signaling Technologies | 9565          |
| Caspase 3                                          | Cell Signaling Technologies | 9662          |
| Caspase 3 cleaved                                  | Cell Signaling Technologies | 9664          |
| c-Jun N-term                                       | Epitomics                   | 1254-1        |
| c-Jun P Ser73                                      | Cell Signaling Technologies | 9164          |
| E-Cadherin                                         | Cell Signaling Technologies | 3195          |
| GSK-3-alpha/beta P Ser21/Ser9                      | Cell Signaling Technologies | 9331          |
| GSK-3-beta                                         | Cell Signaling Technologies | 9315          |
| GSK-3-beta P Ser9                                  | Cell Signaling Technologies | 9336          |
| IGF-1R beta                                        | Cell Signaling Technologies | 3027          |
| ILK1 (4G9)                                         | Cell Signaling Technologies | 3856          |
| Integrin alpha 4                                   | Cell Signaling Technologies | 4600          |
| Integrin Beta 1 [EP1041Y]                          | Abcam                       | ab52971       |
| Integrin beta3                                     | Cell Signaling Technologies | 4702          |
| Integrin beta4                                     | Cell Signaling Technologies | 4707          |
| IRS-1                                              | Cell Signaling Technologies | 2382          |
| JAK1                                               | Cell Signaling Technologies | 3332          |
| JAK1 P Tyr1022,Thr1023                             | Invitrogen (Biosource)      | 44-422G       |
| MAPKAPK-2                                          | Epitomics                   | 1497-1        |
| MAPKAPK-2 P Thr334                                 | Cell Signaling Technologies | 3041          |
| MEK1/2                                             | Cell Signaling Technologies | 9122          |
| MEK1/2 P Ser217/221                                | Cell Signaling Technologies | 9154          |
| MEK6 [EP558Y]                                      | Abcam                       | ab52937       |
| mTOR                                               | Cell Signaling Technologies | 2972          |
| mTOR P Ser2448                                     | Cell Signaling Technologies | 2971          |
| NFkB p105/p50                                      | Calbiochem                  | GTX110585     |
| NFkB p65 Ser536                                    | Cell Signaling Technologies | 3033          |
| p38 MAPK                                           | Cell Signaling Technologies | 9212          |
| p38 MAPK PThr180,Tyr182                            | Cell Signaling Technologies | 9211          |
| p44/42 MAPK (ERK1/2)                               | Cell Signaling Technologies | 9102          |
| p44/42 MAPK (ERK1/2) P Thr202/Thr185,Tyr204/Tyr187 | Cell Signaling Technologies | 4370          |
| p90 S6 kinase (Rsk1-3)                             | Santa Cruz                  | sc-231        |
| PDK-1                                              | Cell Signaling Technologies | 3062          |
| PDK-1 P Ser241                                     | Cell Signaling Technologies | 3061          |
| PKA                                                | Abcam                       | ab26322       |
| Prohibitin                                         | Santa Cruz                  | sc-28259      |
| Raf P Ser338                                       | Cell Signaling Technologies | 9427          |
| Rsk2 Pser 227                                      | Cell Signaling Technologies | 3556          |
| Slug (C19G7                                        | Cell Signaling Technologies | 9585          |
| Smad1/5 P Ser463/Ser465                            | Cell Signaling Technologies | 9516          |
| Smad2 P Ser465,Ser467                              | Cell Signaling Technologies | 3108          |
| Smad2/3 P Ser465/Ser423,Ser467/Ser425              | Cell Signaling Technologies | 8828          |
| Smad3 P Ser423,Ser425                              | Cell Signaling Technologies | 9520          |
| Stat3                                              | Cell Signaling Technologies | 12640         |
| Stat3 P Y705                                       | Cell Signaling Technologies | 9131          |
| Stat5                                              | Invitrogen (Biosource)      | 44-368G       |
| Stat5 P Tyr694                                     | Cell Signaling Technologies | 9351          |
| Stat6                                              | Cell Signaling Technologies | 9362          |
| Stat6 P Tyr641                                     | Cell Signaling Technologies | 9361          |
| Tsc-2 (Tuberin)                                    | Cell Signaling Technologies | 3612          |
| Tsc-2 (Tuberin) P Thr1462                          | Cell Signaling Technologies | 3617          |
| YAP P Ser127                                       | Cell Signaling Technologies | 4911          |
| YAP1 [EP1674Y]                                     | Abcam                       | ab52771       |
| Zyxin                                              | Cell Signaling Technologies | 3553          |

**Table S3:** Immunocytochemistry and flow cytometry antibodies

All antibodies were diluted to the specified concentration in blocking buffer.

| Epitope recognised                                            | Clone      | Host species | Dilution factor | Supplier    | Cat. number |
|---------------------------------------------------------------|------------|--------------|-----------------|-------------|-------------|
| $\beta$ -catenin (active), dephosphorylated on Ser37 or Thr41 | 8E7        | Mouse        | 1:1000          | Millipore   | 05-665      |
| E-cadherin                                                    | DECMA-1    | Rat          | 1:200           | Sigma       | U3254       |
| E-cadherin, eFluor660-conjugated                              | DECMA-1    | Rat          | 1:300           | eBioscience | 50-3249-82  |
| GFP                                                           | Polyclonal | Chicken      | 1:1000          | Abcam       | 13970       |
| HA                                                            | HA-7       | Mouse        | 1:1000          | Sigma       | H3663       |
| Lamin $\beta$ 1                                               | Polyclonal | Chicken      | 1:1000          | Abcam       | Ab90169     |
| Lamin $\beta$ 1                                               | Polyclonal | Rabbit       | 1:1000          | Abcam       | Ab16048     |
| N-cadherin                                                    | 32         | Mouse        | 1:200           | BD          | 610920      |
| N-cadherin, AlexaFluor488-conjugated                          | Polyclonal | Sheep        | 1:50            | R&D         | FAB6426G    |
| Oct4                                                          | N-19       | Goat         | 1:200           | Santa Cruz  | SC-8628     |
| Sox1                                                          | N23-844    | Mouse        | 1:200           | Pharmigen   | 560749      |

**Table S4.** Significant changes in gene expression 48 h after N-cadherin overexpression during neural differentiation. Cells were cultured for 48 h in neural differentiation conditions when N-cadherin overexpression was induced by addition of Dox. RNA samples were collected for Nanostring gene expression analysis 48 h later. The analysis included 770 genes involved in cellular signalling pathways. Values show mean enrichment compared to un-induced controls.  $N=3$  biological replicates.

[Click here to Download Table S4](#)
